# Supplementary material for: Multi-scale water balance analysis of a thawing boreal peatland complex near the southern permafrost limit in western Canada
Source: Copernicus journal article supplement (doi:10.5194/hess-2024-367), 2025-01-20

## **Multi-scale water balance analysis of a thawing boreal peatland complex near the southern permafrost limit in western Canada**

Alexandre Lhosmot<sup>1\*</sup>, Gabriel Hould Gosselin<sup>1,2\*</sup>, Manuel Helbig<sup>1,3</sup>, Julien Fouché<sup>1,4</sup>, Youngryel Ryu<sup>5</sup>, Matteo Detto<sup>6</sup>, Ryan Connon<sup>7</sup>, William Quinton<sup>8</sup>, Tim Moore<sup>9</sup> and Oliver Sonnentag<sup>1, 10</sup>

<sup>1</sup>Département de géographie, Université de Montréal, Montréal, QC, Canada

<sup>2</sup>Department of Geography and Environmental Sciences, Northumbria University, Newcastle upon Tyne, UK

<sup>3</sup>Department of Physics & Atmospheric Science, Dalhousie University, Halifax, NS, Canada

<sup>4</sup>LISAH, Université de Montpellier, INRAE, IRD, Institut Agro, AgroParisTech, Montpellier, France

<sup>5</sup>Department of Landscape Architecture and Rural Systems Engineering, Seoul National University, Seoul, South Korea

<sup>6</sup>Department of Ecology and Evolutionary Biology, Princeton University, Princeton, NJ, USA

<sup>7</sup>Environment and Climate Change, Government of the Northwest Territories, Yellowknife, NT, Canada

<sup>8</sup>Cold Regions Research Centre, Wilfrid Laurier University, Waterloo, ON, Canada

<sup>9</sup>Department of Geography, McGill University, Montréal, QC, Canada

<sup>10</sup>Department of Geography and Environmental Studies, Wilfrid Laurier University, Waterloo, ON, Canada

\*These authors share the co-first authorship.

*Correspondence to:* Alexandre Lhosmot (alexandreghosmot@gmail.com) and Oliver Sonnentag ([oliver.sonnentag@umontreal.ca](mailto:oliver.sonnentag@umontreal.ca))

### **Supplementary figures**



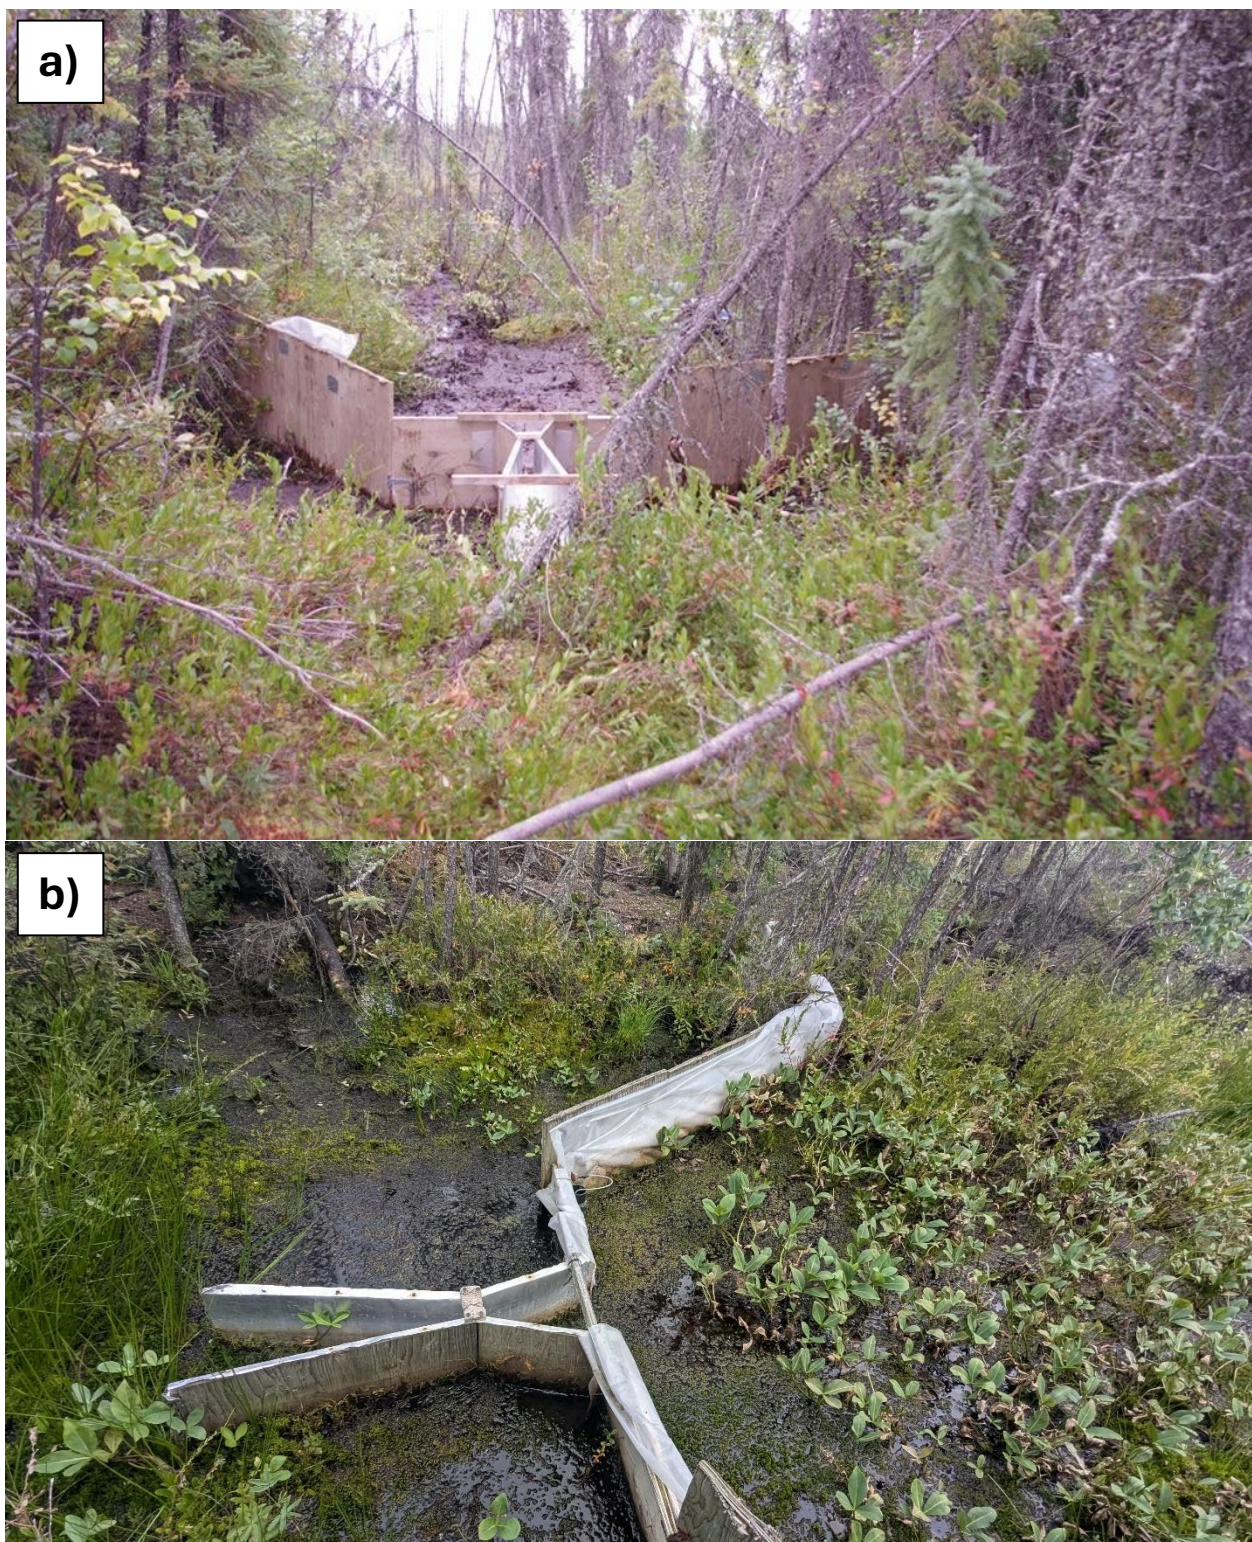

**Figures S1:** Cutthroat flume installed at the West sub-basin outlet West1 in a) 2014 (i.e., before the late-season wildfire in October 2022), and b) 2024 (i.e., after the late-season wildfire in October 2022).



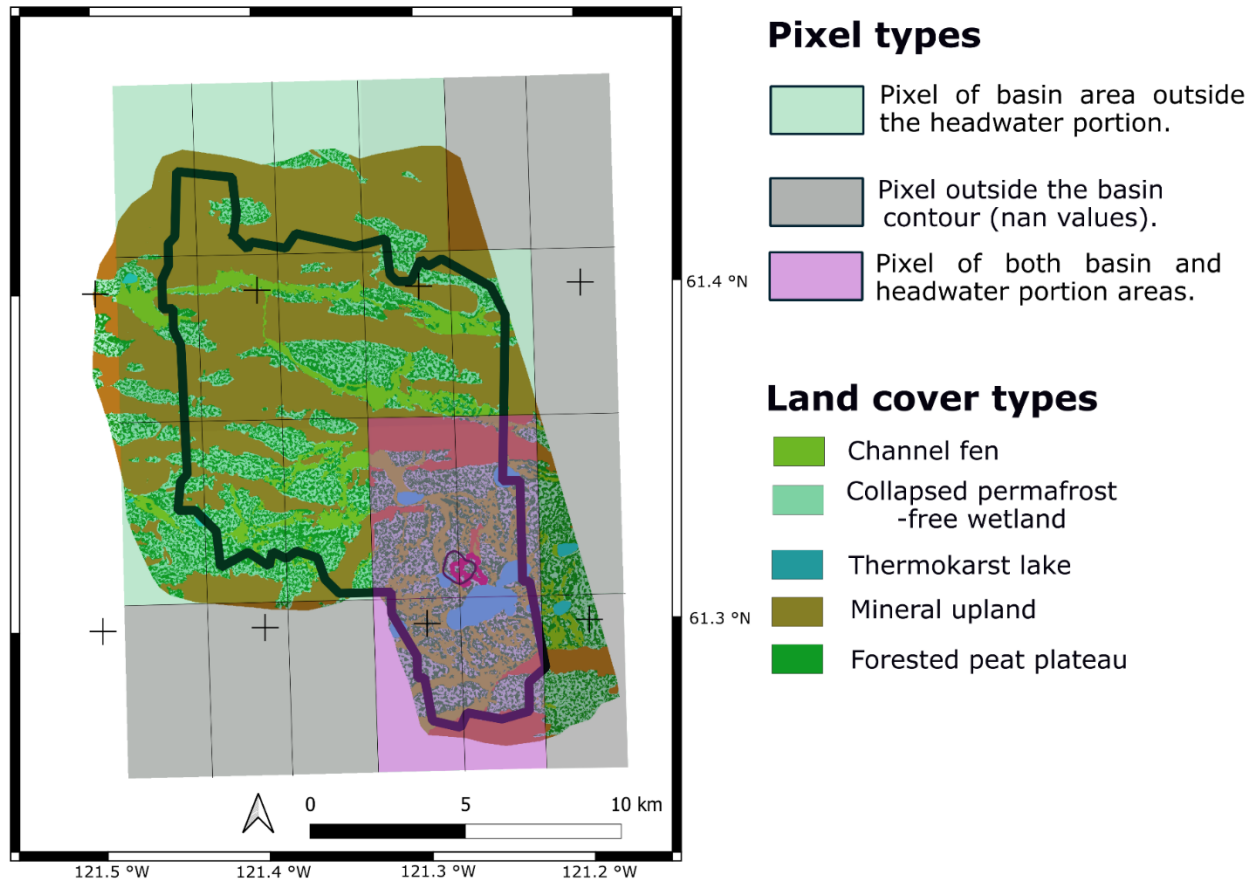

**Figure S2:** Location and description of the pixels (0.05 degrees of resolution) used for estimating ET with the Breathing Earth System Simulator (BESS) model (Jiang et al., 2016). The landscape map was produced by Chasmer et al. (2014). The black contour corresponds to the basin boundaries derived-from the SRTM DEM (130 km<sup>2</sup>).

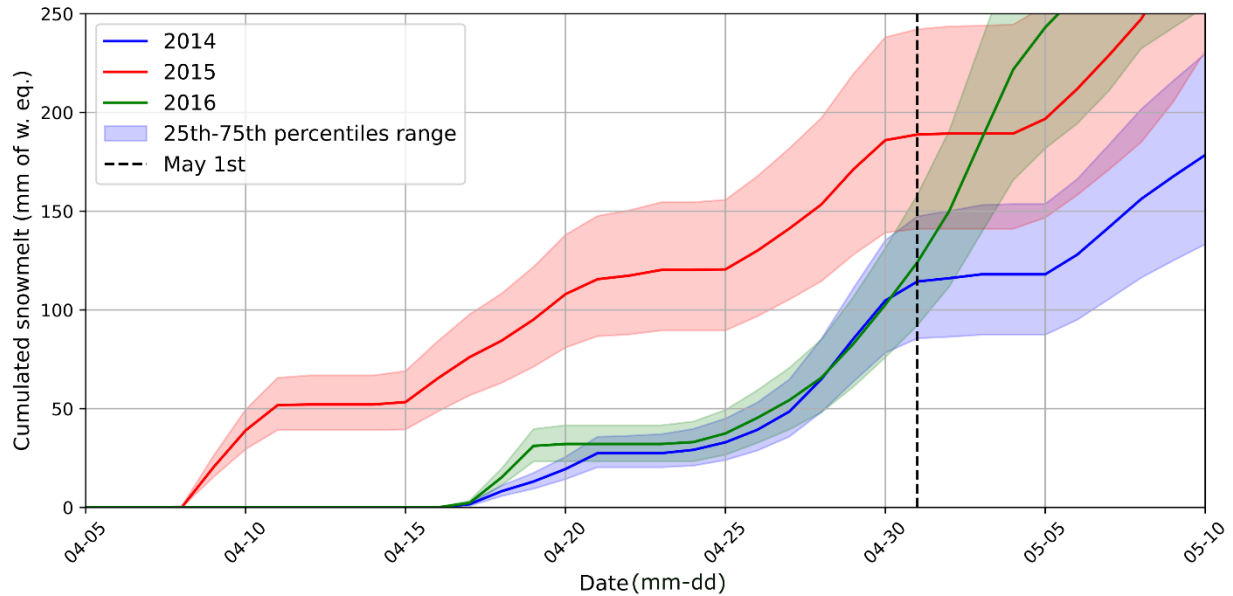

**Figure S3:** Cumulative snowmelt evolution estimates for 2014, 2015, and 2016. The coloured line represents the median of the 10,000 simulations, while the shaded area represents the interquartile range (25th to 75th percentiles). The vertical black dashed line marks May 1st. We performed a simple snowmelt model using the temperature index equation (Pomeroy and Brun, 2001; Fontrodona-Bach et al., 2025):

$$\text{Snowmelt (mm of water equivalent)} = C\_f \times (T\_air - T\_threshold)$$

where,  $C\_f$  is the melt factor ( $\text{mm } ^\circ\text{C}^{-1} \text{ day}^{-1}$ ),  $T\_air$  is the daily mean air temperature measured at Scotty Creek,  $T\_threshold$  is the threshold temperature at which snow begins to melt.  $T\_threshold$  ranged from  $-1^\circ\text{C}$  to  $+1^\circ\text{C}$  (Fontrodona-Bach et al., 2025 [preprint], and references therein).  $C\_f$  was estimated using the relationship between snow density and  $C\_f$  described by Rango and Martinec (1995). Given that snow density at Scotty Creek ranges from 0.11 to 0.29 (Connon et al., 2021), the corresponding  $C\_f$  values were estimated to range from  $1 \text{ mm } ^\circ\text{C}^{-1} \text{ day}^{-1}$  to  $3 \text{ mm } ^\circ\text{C}^{-1} \text{ day}^{-1}$ . To account for these uncertainties, we performed 10,000 simulations using a Monte Carlo approach, where  $C\_f$  and  $T\_threshold$ s were randomly sampled within their respective ranges.

#### References:

- Connon, R.F., Chasmer, L., Haughton, E., Helbig, M., Hopkinson, C., Sonnentag, O., Quinton, W.L., 2021. The implications of permafrost thaw and land cover change on snow water equivalent accumulation, melt and runoff in discontinuous permafrost peatlands. *Hydrological Processes* 35, e14363. <https://doi.org/10.1002/hyp.14363>
- Fontrodona-Bach, A., Schaepli, B., Woods, R., Larsen, J.R., 2025. [Preprint] Estimating robust melt factors and temperature thresholds for snow modelling across the Northern Hemisphere. <https://doi.org/10.5194/egusphere-2025-1214>
- Rango, A., Martinec, J., 1995. Revisiting the degree-day method for snowmelt computations. *J American Water Resour Assoc* 31, 657–669. <https://doi.org/10.1111/j.1752-1688.1995.tb03392.x>

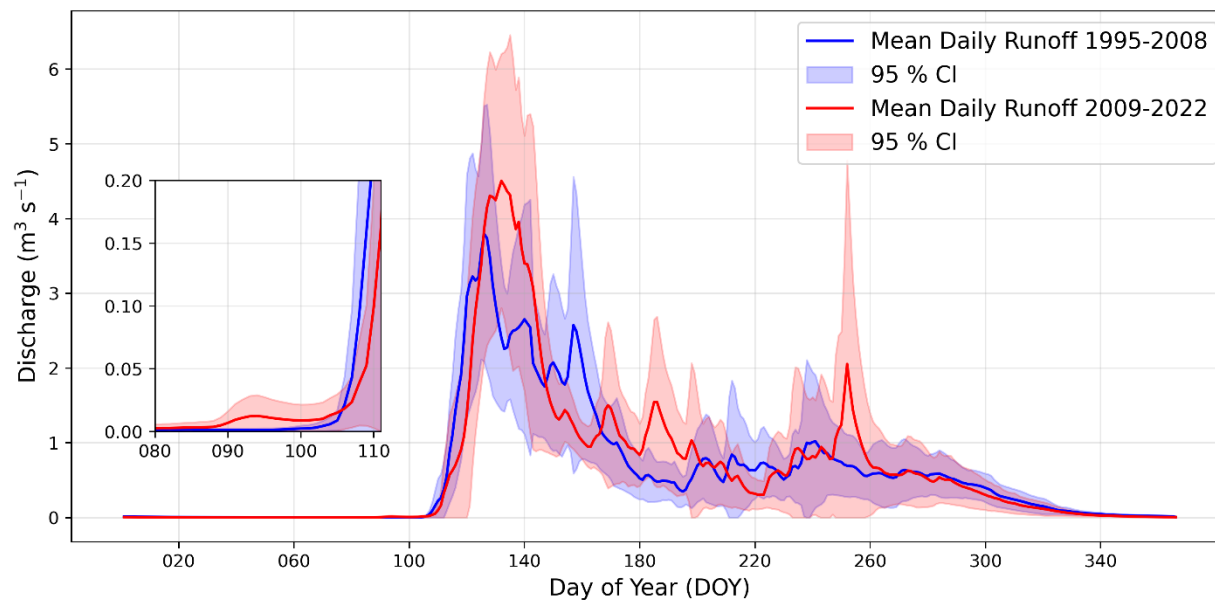

**Figure S4:** Composite hydrographs for 14-year periods of 1995-2008 and 2009-2022 at Scotty Creek basin outlet. Colored bands correspond to 95 % confidence intervals. The inlet shows a zoom on the spring freshet onset.

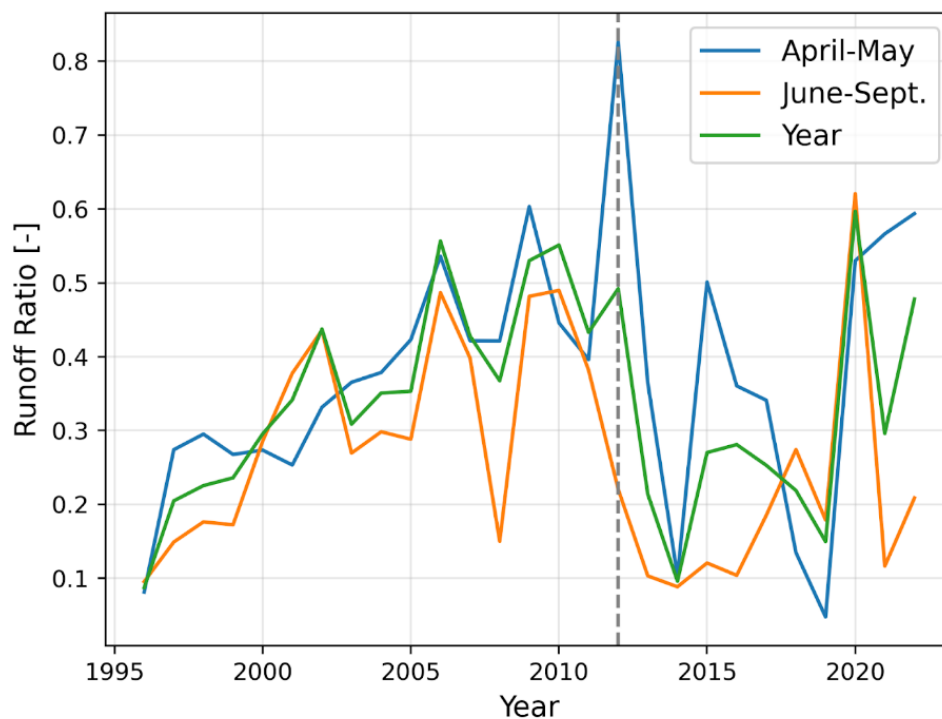

**Figure S5:** Annual, spring freshet (April–May), and summer (June–September) runoff ratios at Scotty Creek basin. Late-winter snow water equivalent is included in the spring freshet runoff ratio calculation. The dashed vertical gray line corresponds to 2012.

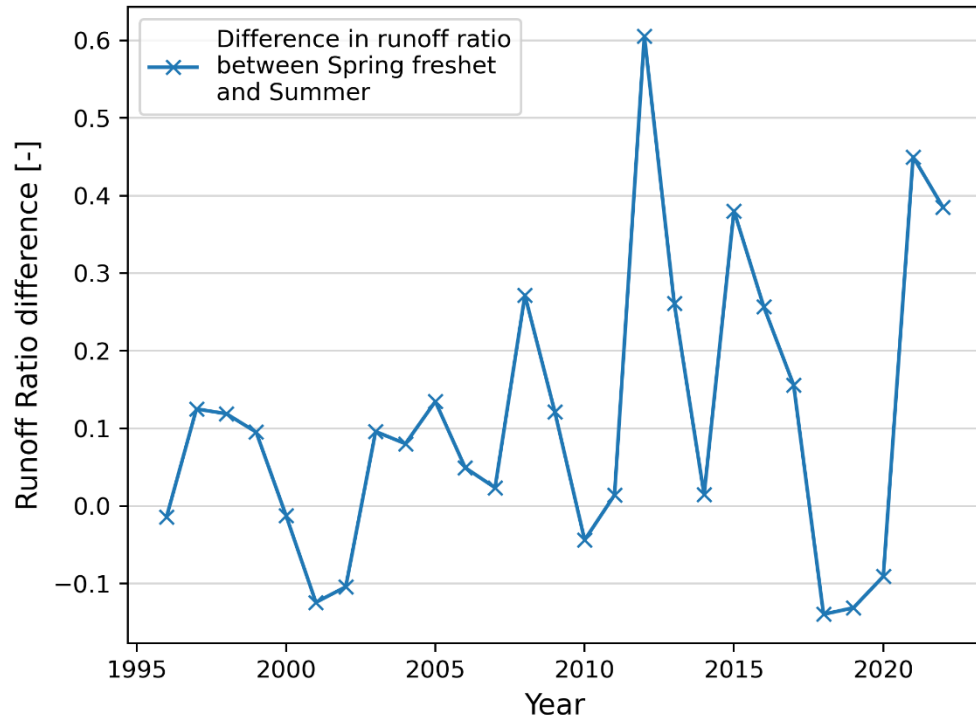

**Figure S6:** Difference between spring freshet and summer runoff ratios.

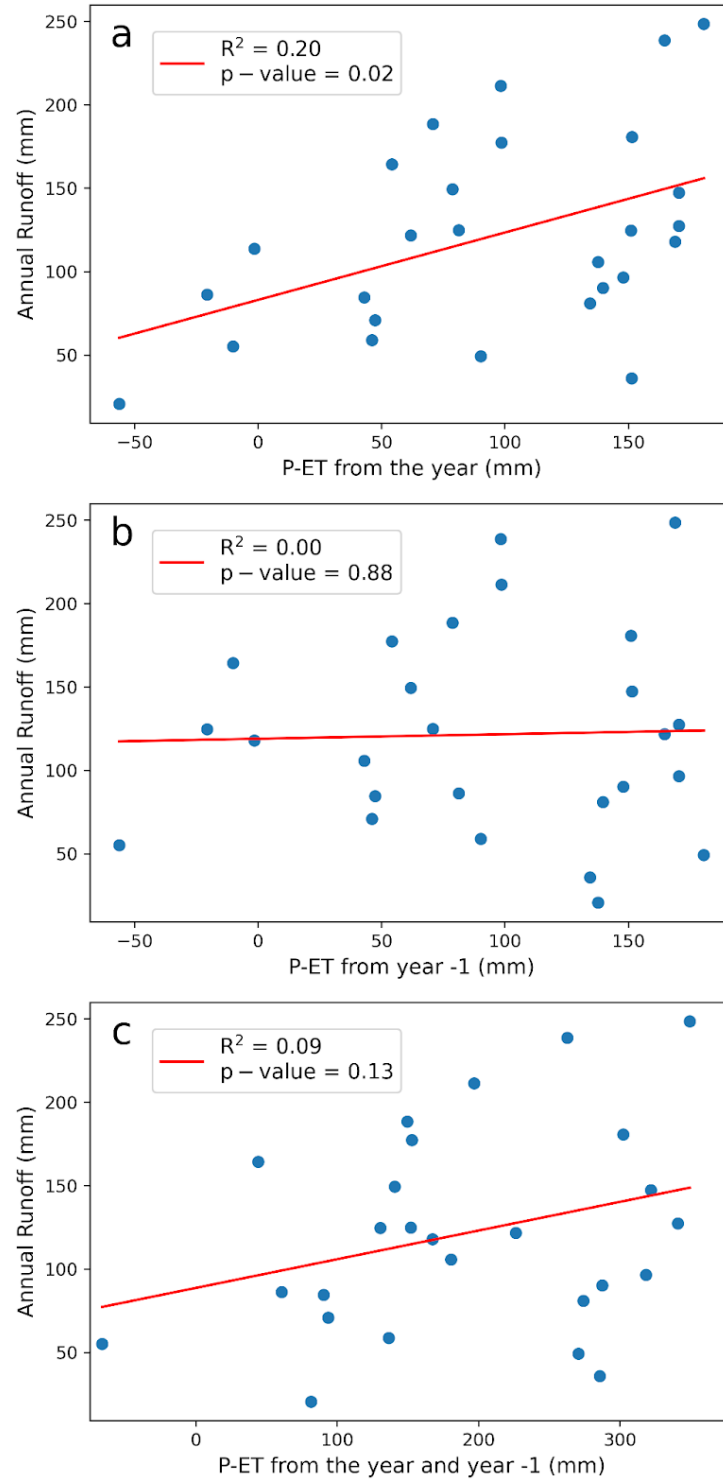

**Figure S7:** Annual runoff vs. a) current-year effective precipitation, b) previous year's effective precipitation, and c) cumulative effective precipitation from current and previous years. Effective precipitation is defined as precipitation minus evapotranspiration.

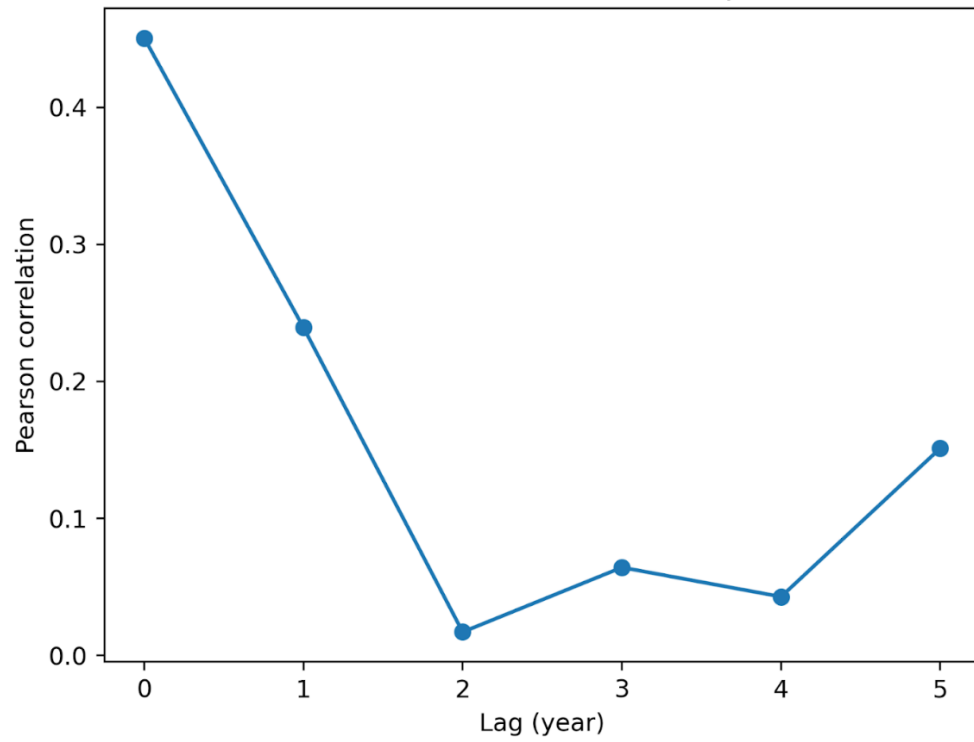

**Figure S8:** Cross-correlation plot between annual basin runoff and effective precipitation (precipitation minus evapotranspiration).



### Supplementary Tables

**Table S1.** Growing season water balances (May-September, 2014-2016, mm) for the West, East, East<sub>FIELD</sub> (using the effective field derived sub-basin drainage area, Connon et al., 2015), and South sub-basins at Scotty Creek (Figure 3): snow water equivalent ( $SWE_{WEST}$ ,  $SWE_{EAST}$ ,  $SWE_{EAST-FIELD}$  and  $SWE_{SOUTH}$ ), rainfall ( $R_{WEST} = R_{EAST} = R_{SOUTH}$ ), evapotranspiration ( $ET_{LAND} \approx ET_{WEST}$ ,  $ET_{EAST}$ ,  $ET_{EAST-FIELD}$  and  $ET_{SOUTH}$ ), runoff obtained from discharge measurements ( $Q_{WEST}$ ,  $Q_{EAST}$ ,  $Q_{EAST-FIELD}$  and  $Q_{SOUTH}$ ) and water storage change ( $\Delta S_{WEST}$ ,  $\Delta S_{EAST}$ ,  $\Delta S_{EAST-FIELD}$  and  $\Delta S_{SOUTH}$ ). Potential drainage area was delineated with automated terrain analysis using a digital elevation model ( $Q_{WEST}$ ,  $Q_{EAST}$  and  $Q_{SOUTH}$ ) and derived from field observations ( $Q_{EAST-FIELD}$ ). The water balance residual (RES) results from Eq. 1. Wetland water table position (WTP) and discharge data to calculate  $\Delta S_{SOUTH}$  and  $Q_{EAST}$  are not available in 2014 and 2015 (not measured), and 2016 (instrument failure), respectively.

|                                       | $SWE_{SUB-BASIN}$<br>(mm) | R<br>(mm) | $ET_{SUB-BASIN}$<br>(mm) | $Q_{SUB-BASIN}$<br>(mm) | $\Delta S_{SUB-BASIN}$<br>(mm) | $RES_{SUB-BASIN}$<br>(mm) |
|---------------------------------------|---------------------------|-----------|--------------------------|-------------------------|--------------------------------|---------------------------|
| <b>WEST sub-basin</b>                 |                           |           |                          |                         |                                |                           |
| 2014                                  | 102                       | 208       | 351                      | 4                       | -159                           | 114                       |
| 2015                                  | 167                       | 316       | 426                      | 35                      | -101                           | 122                       |
| 2016                                  | 128                       | 220       | 442                      | 66                      | -195                           | 34                        |
| <b>EAST sub-basin</b>                 |                           |           |                          |                         |                                |                           |
| 2014                                  | 102                       | 208       | 353                      | 65                      | -27                            | -81                       |
| 2015                                  | 169                       | 316       | 437                      | 74                      | 3                              | -30                       |
| 2016                                  | 128                       | 220       | 443                      | —                       | -75                            | —                         |
| <b>EAST<sub>FIELD</sub> sub-basin</b> |                           |           |                          |                         |                                |                           |
| 2014                                  | 103                       | 208       | 303                      | 311                     | -16                            | -287                      |
| 2015                                  | 172                       | 316       | 413                      | 358                     | 2                              | -285                      |
| 2016                                  | 129                       | 220       | 415                      | —                       | -43                            | —                         |
| <b>SOUTH sub-basin</b>                |                           |           |                          |                         |                                |                           |
| 2014                                  | 102                       | 208       | 384                      | 25                      | —                              | —                         |
| 2015                                  | 167                       | 316       | 452                      | 40                      | —                              | —                         |
| 2016                                  | 128                       | 220       | 460                      | 100                     | -250                           | 38                        |

**Table S2.** Growing season monthly (May-September, 2014-2016) water balances (mm month<sup>-1</sup>) for the West sub-basin (Figure 4): snow water equivalent (SWE<sub>WEST</sub>), rainfall (R<sub>WEST</sub>), boreal peatland complex evapotranspiration (ET<sub>LAND</sub>) approximately corresponding to ET from the West sub-basin (ET<sub>LAND</sub>  $\approx$  ET<sub>WEST</sub>), runoff (Q<sub>WEST</sub>), and water storage change ( $\Delta$ S<sub>WEST</sub>). RES<sub>WEST</sub> indicates the monthly water balance residual resulting from Eq. 1.

| <b>2014</b> | <b>SWE<sub>WEST</sub><br/>(mm)</b> | <b>R<sub>WEST</sub> (mm)</b> | <b>ET<sub>WEST</sub><br/>(mm)</b> | <b>Q<sub>WEST</sub><br/>(mm)</b> | <b><math>\Delta</math>S<sub>WEST</sub><br/>(mm)</b> | <b>RES<sub>WEST</sub><br/>(mm)</b> |
|-------------|------------------------------------|------------------------------|-----------------------------------|----------------------------------|-----------------------------------------------------|------------------------------------|
| <b>2014</b> |                                    |                              |                                   |                                  |                                                     |                                    |
| <b>MAY</b>  | 102                                | 20                           | 60                                | 3                                | -90                                                 | 149                                |
| <b>JUN</b>  | 0                                  | 64                           | 85                                | 0                                | -8                                                  | -14                                |
| <b>JUL</b>  | 0                                  | 52                           | 94                                | 0                                | -38                                                 | -4                                 |
| <b>AUG</b>  | 0                                  | 57                           | 76                                | 0                                | -1                                                  | -17                                |
| <b>SEP</b>  | 0                                  | 15                           | 36                                | 0                                | -21                                                 | 0                                  |
| <b>2015</b> |                                    |                              |                                   |                                  |                                                     |                                    |
| <b>MAY</b>  | 167                                | 24                           | 90                                | 15                               | -90                                                 | 176                                |
| <b>JUN</b>  | 0                                  | 43                           | 114                               | 4                                | -64                                                 | -12                                |
| <b>JUL</b>  | 0                                  | 146                          | 94                                | 4                                | 63                                                  | -15                                |
| <b>AUG</b>  | 0                                  | 47                           | 83                                | 6                                | -19                                                 | -23                                |
| <b>SEP</b>  | 0                                  | 55                           | 45                                | 6                                | 9                                                   | -5                                 |
| <b>2016</b> |                                    |                              |                                   |                                  |                                                     |                                    |
| <b>MAY</b>  | 128                                | 36                           | 82                                | 50                               | -85                                                 | 117                                |
| <b>JUN</b>  | 0                                  | 60                           | 119                               | 11                               | -54                                                 | -16                                |
| <b>JUL</b>  | 0                                  | 45                           | 107                               | 2                                | -58                                                 | -6                                 |
| <b>AUG</b>  | 0                                  | 29                           | 82                                | 1                                | -35                                                 | -19                                |
| <b>SEP</b>  | 0                                  | 51                           | 53                                | 2                                | 37                                                  | -41                                |

**Table S3.** Annual (hydrological year [HY]: October-September) water flux components (mm year<sup>-1</sup>) over the period 1996-2022: snow water equivalent (SWE), rainfall (R), precipitation (P), evapotranspiration (ET) from the Breathing Earth System Simulator (BESS) at the basin and basin's headwater portion scales (ET<sub>BESS\_BASIN</sub> and ET<sub>BESS\_HEAD</sub>), runoff (Q<sub>BASIN\_130</sub> and Q<sub>BASIN\_202</sub>), water storage change calculated from the other water flux components ( $\Delta S_{\text{BASIN}_130}$  and  $\Delta S_{\text{BASIN}_202}$ ) and runoff ratio (Runoff ratio<sub>130</sub> and Runoff ratio<sub>202</sub>). The indices "130" and "202" indicate the surface of the basin in square kilometers.

| <b>HY</b>            | <b>SWE</b> | <b>R</b> | <b>P</b> | <b>ET</b><br>BESS_BASIN | <b>ET</b><br>BESS_HEAD | <b>Q</b><br>BASIN_130 | <b>Q</b><br>BASIN_202 | <b><math>\Delta S</math></b><br>BASIN_130 | <b><math>\Delta S</math></b><br>BASIN_202 | <b>Runoff</b><br><b>ratio</b> <sub>130</sub> | <b>Runoff</b><br><b>ratio</b> <sub>202</sub> |
|----------------------|------------|----------|----------|-------------------------|------------------------|-----------------------|-----------------------|-------------------------------------------|-------------------------------------------|----------------------------------------------|----------------------------------------------|
| 1995-10 /<br>1996-09 | 107        | 305      | 412      | —                       | —                      | 46                    | 30                    | 105                                       | 122                                       | 0.1                                          | 0.1                                          |
| 1996-10 /<br>1997-09 | 91         | 304      | 395      | —                       | —                      | 103                   | 67                    | 31                                        | 68                                        | 0.3                                          | 0.2                                          |
| 1997-10 /<br>1998-09 | 95         | 306      | 401      | —                       | —                      | 115                   | 74                    | 24                                        | 65                                        | 0.3                                          | 0.2                                          |
| 1998-10 /<br>1999-09 | 126        | 283      | 409      | —                       | —                      | 123                   | 79                    | 25                                        | 69                                        | 0.3                                          | 0.2                                          |
| 1999-10 /<br>2000-09 | 135        | 297      | 431      | —                       | —                      | 163                   | 105                   | 8                                         | 66                                        | 0.4                                          | 0.2                                          |
| 2000-10 /<br>2001-09 | 107        | 324      | 431      | —                       | —                      | 188                   | 121                   | -18                                       | 49                                        | 0.4                                          | 0.3                                          |
| 2001-10 /<br>2002-09 | 181        | 233      | 413      | 262                     | 255                    | 231                   | 149                   | -79                                       | 3                                         | 0.6                                          | 0.4                                          |
| 2002-10 /<br>2003-09 | 119        | 285      | 404      | 253                     | 250                    | 159                   | 103                   | -8                                        | 48                                        | 0.4                                          | 0.3                                          |
| 2003-10 /<br>2004-09 | 96         | 151      | 246      | 267                     | 258                    | 110                   | 71                    | -131                                      | -92                                       | 0.4                                          | 0.3                                          |
| 2004-10 /<br>2005-09 | 139        | 215      | 354      | 272                     | 270                    | 160                   | 103                   | -78                                       | -21                                       | 0.5                                          | 0.3                                          |
| 2005-10 /<br>2006-09 | 128        | 211      | 339      | 268                     | 268                    | 241                   | 155                   | -170                                      | -84                                       | 0.7                                          | 0.5                                          |
| 2006-10 /<br>2007-09 | 116        | 234      | 349      | 270                     | 270                    | 191                   | 123                   | -112                                      | -44                                       | 0.5                                          | 0.4                                          |

|                      |     |     |     |     |     |     |     |      |     |     |     |
|----------------------|-----|-----|-----|-----|-----|-----|-----|------|-----|-----|-----|
| 2007-10 /<br>2008-09 | 132 | 199 | 331 | 269 | 267 | 155 | 100 | -94  | -38 | 0.5 | 0.3 |
| 2008-10 /<br>2009-09 | 140 | 311 | 450 | 286 | 282 | 305 | 196 | -140 | -32 | 0.7 | 0.4 |
| 2009-10 /<br>2010-09 | 82  | 301 | 384 | 285 | 282 | 270 | 174 | -172 | -76 | 0.7 | 0.5 |
| 2010-10 /<br>2011-09 | 133 | 277 | 410 | 311 | 306 | 227 | 146 | -128 | -47 | 0.6 | 0.4 |
| 2011-10 /<br>2012-09 | 81  | 253 | 334 | 280 | 278 | 210 | 135 | -156 | -81 | 0.6 | 0.4 |
| 2012-10 /<br>2013-09 | 106 | 153 | 259 | 269 | 264 | 71  | 45  | -81  | -56 | 0.3 | 0.2 |
| 2013-10 /<br>2014-09 | 81  | 134 | 215 | 272 | 271 | 26  | 17  | -83  | -73 | 0.1 | 0.1 |
| 2014-10 /<br>2015-09 | 118 | 274 | 392 | 254 | 254 | 135 | 87  | 2    | 51  | 0.3 | 0.2 |
| 2015-10 /<br>2016-09 | 126 | 175 | 301 | 258 | 257 | 108 | 70  | -65  | -27 | 0.4 | 0.2 |
| 2016-10 /<br>2017-09 | 84  | 196 | 280 | 233 | 235 | 91  | 58  | -43  | -11 | 0.3 | 0.2 |
| 2017-10 /<br>2018-09 | 90  | 179 | 269 | 223 | 222 | 75  | 48  | -29  | -2  | 0.3 | 0.2 |
| 2018-10 /<br>2019-09 | 84  | 246 | 330 | 240 | 237 | 63  | 41  | 27   | 50  | 0.2 | 0.1 |
| 2019-10 /<br>2020-09 | 96  | 321 | 416 | 236 | 232 | 317 | 204 | -137 | -24 | 0.8 | 0.5 |
| 2020-10 /<br>2021-09 | 101 | 298 | 399 | 230 | 230 | 151 | 97  | 18   | 72  | 0.4 | 0.2 |
| 2021-10 /<br>2022-09 | 127 | 111 | 238 | 239 | 244 | 145 | 93  | -147 | -95 | 0.6 | 0.4 |

Updated Figure 2:

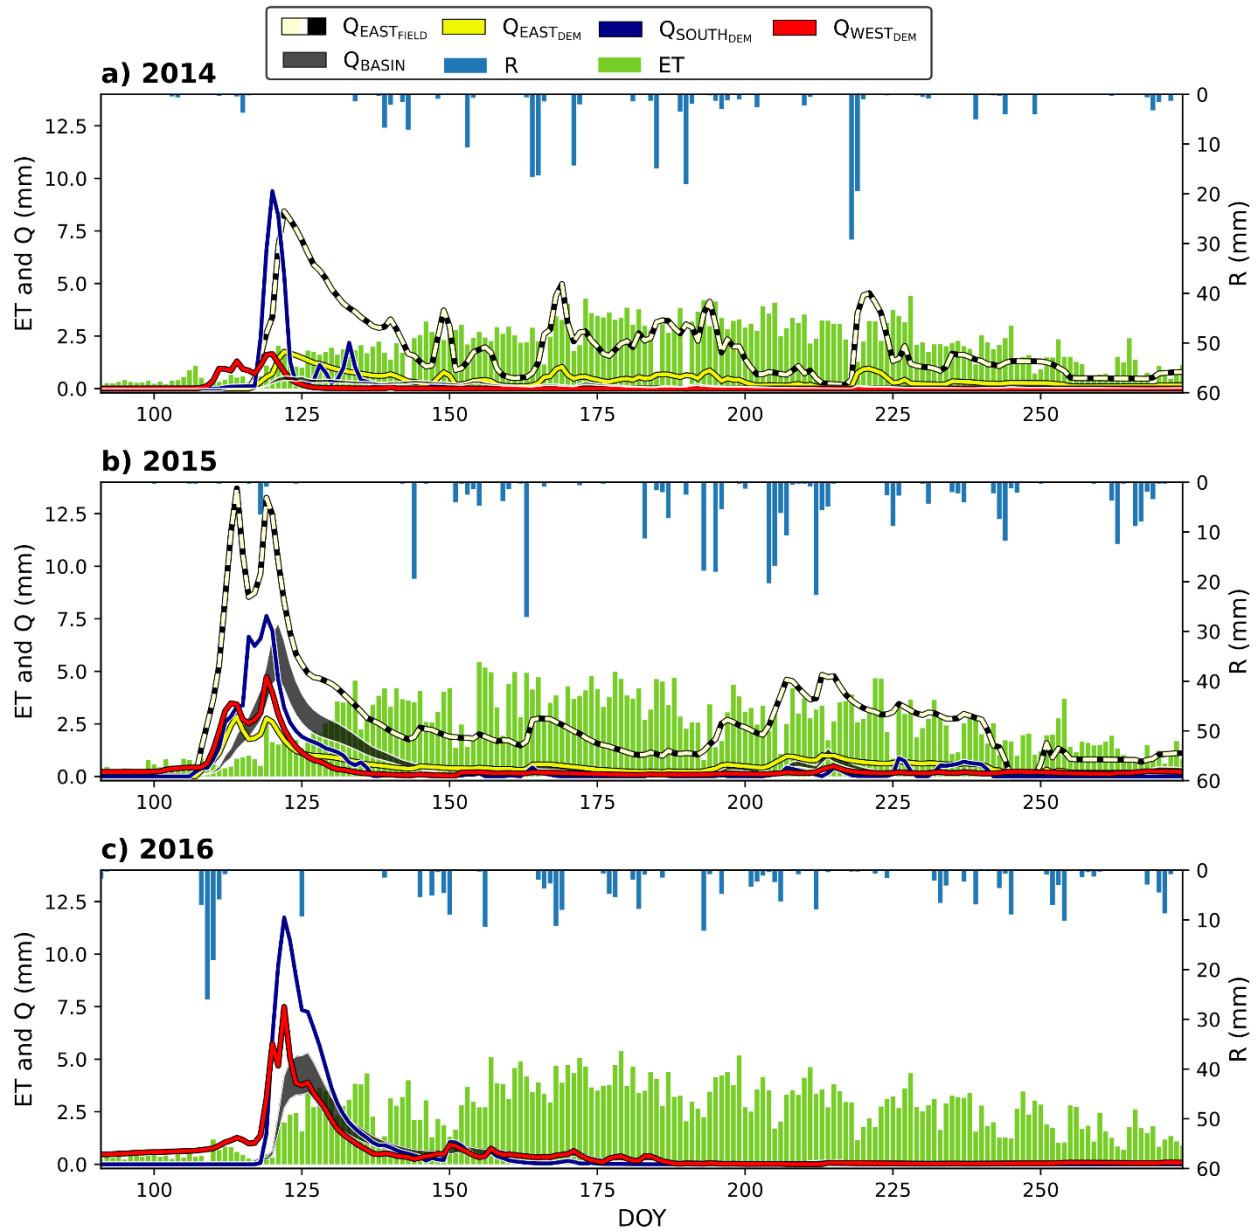



Updated Figure 6:

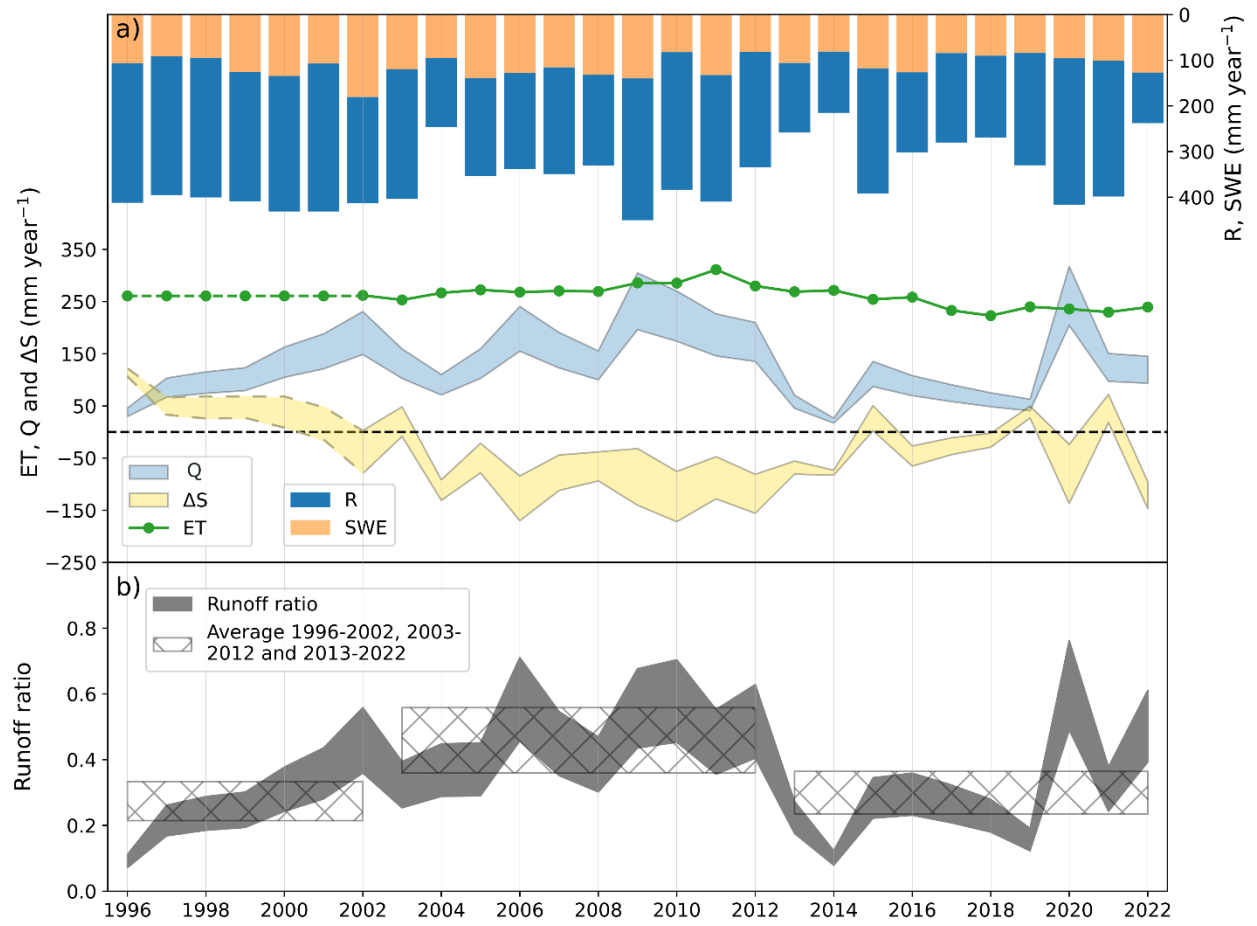

Supplement: Supplementary file [file hess-2024-367-AC2-supplement.pdf]
