# Supplementary material for: Multi-scale water balance analysis of a thawing boreal peatland complex near the southern permafrost limit in western Canada
Source: Copernicus journal article supplement (doi:10.5194/hess-2024-367), 2025-01-20
Supplement: Supplementary file 1 [file hess-2024-367-supplement.pdf]

# Multi-scale water balance analysis of a thawing boreal peatland complex near the southern permafrost limit in western Canada

Alexandre Lhosmot<sup>1\*</sup>, Gabriel Hould Gosselin<sup>1,2\*</sup>, Manuel Helbig<sup>1,3</sup>, Julien Fouché<sup>1,4</sup>, Youngryel Ryu<sup>5</sup>, Matteo Detto<sup>6</sup>, Ryan Connon<sup>7</sup>, William Quinton<sup>8</sup>, Tim Moore<sup>9</sup> and Oliver Sonntag<sup>1,10</sup>

<sup>1</sup>Département de géographie, Université de Montréal, Montréal, QC, Canada

<sup>2</sup>Department of Geography and Environmental Sciences, Northumbria University, Newcastle upon Tyne, UK

<sup>3</sup>Department of Physics & Atmospheric Science, Dalhousie University, Halifax, NS, Canada

<sup>4</sup>LISAH, Université de Montpellier, INRAE, IRD, Institut Agro, AgroParisTech, Montpellier, France

<sup>5</sup>Department of Landscape Architecture and Rural Systems Engineering, Seoul National University, Seoul, South Korea

<sup>6</sup>Department of Ecology and Evolutionary Biology, Princeton University, Princeton, NJ, USA

<sup>7</sup>Environment and Climate Change, Government of the Northwest Territories, Yellowknife, NT, Canada

<sup>8</sup>Cold Regions Research Centre, Wilfrid Laurier University, Waterloo, ON, Canada

<sup>9</sup>Department of Geography, McGill University, Montréal, QC, Canada

<sup>11</sup>Department of Geography and Environmental Studies, Wilfrid Laurier University, Waterloo, ON, Canada

\*These authors share the co-first authorship.

*Correspondence to:* Alexandre Lhosmot (alexandre.lhosmot@gmail.com) and Oliver Sonntag ([oliver.sonntag@umontreal.ca](mailto:oliver.sonntag@umontreal.ca))

## 1. Supplementary figures

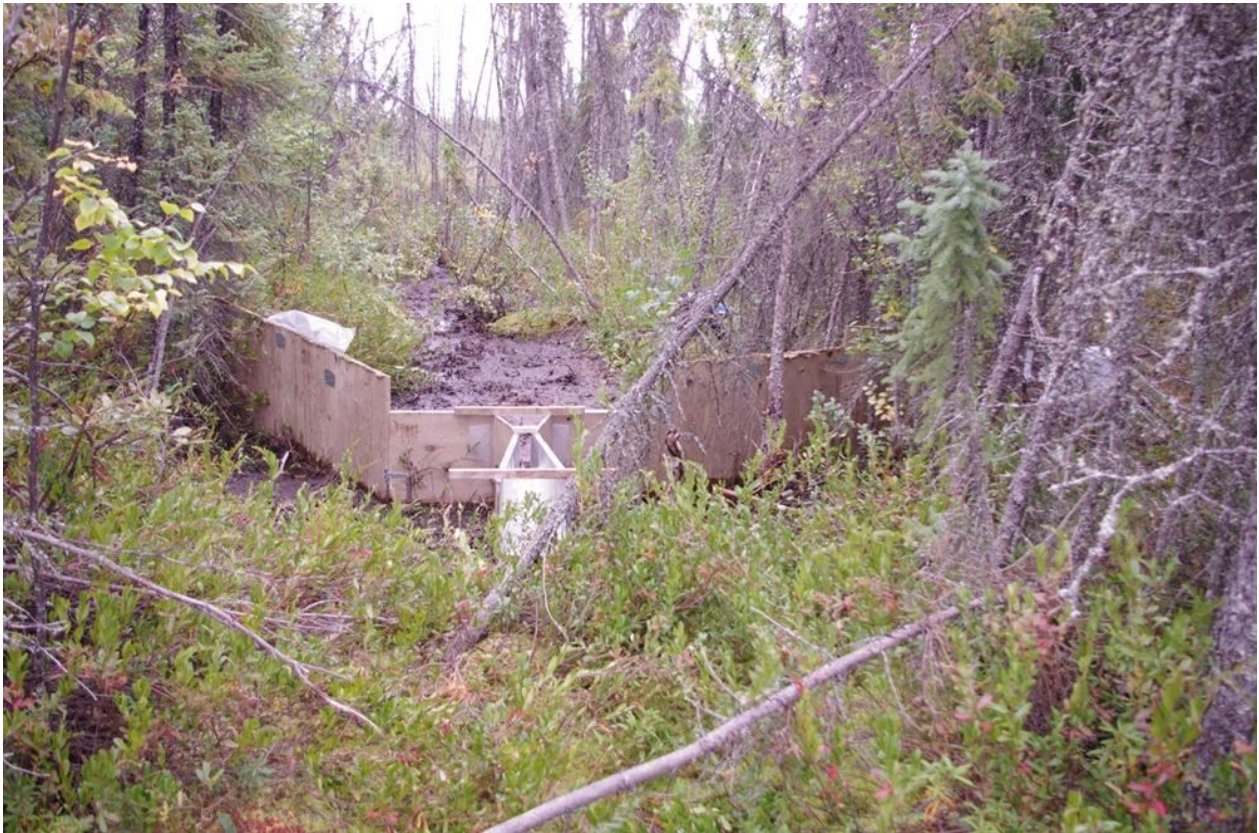

24

25

Figure S1. One of the two flume box systems installed at the West sub-basin (the western outlet).

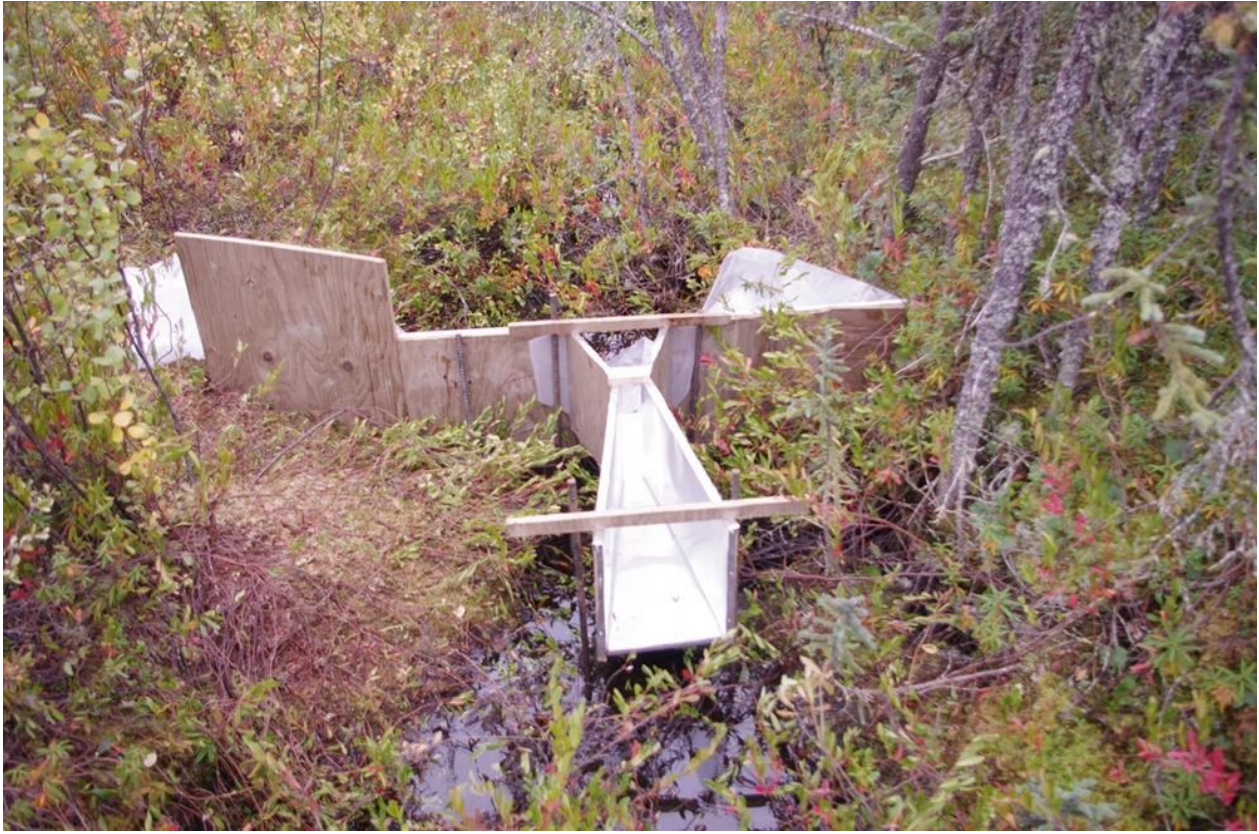

26

27

Figure S2. One of the two flume box systems installed at the South sub-basin (the southern one).

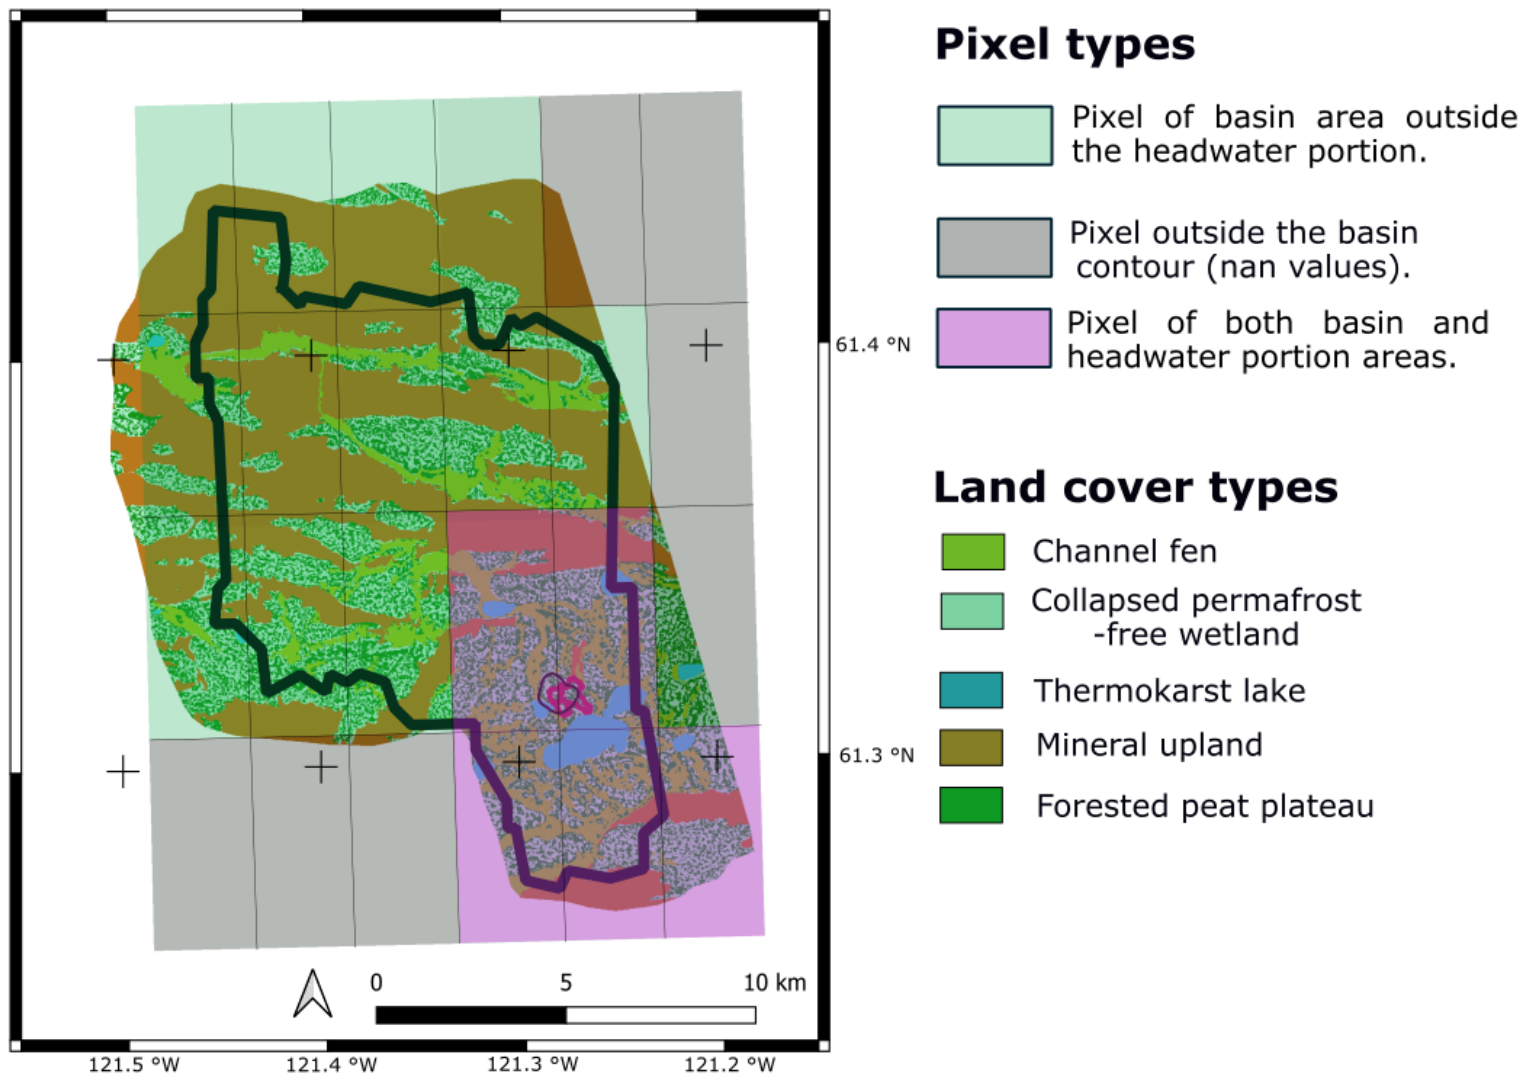

**Figure S3: Location and description of the pixels (0.05 degrees of resolution) used for estimating ET with the Breathing Earth System Simulator (BESS) model (Jiang et al., 2016). The landscape map is produced by Chasmer et al. (2014). The black contour corresponds to the basin boundaries derived from the SRTM DEM (130 km<sup>2</sup>).**

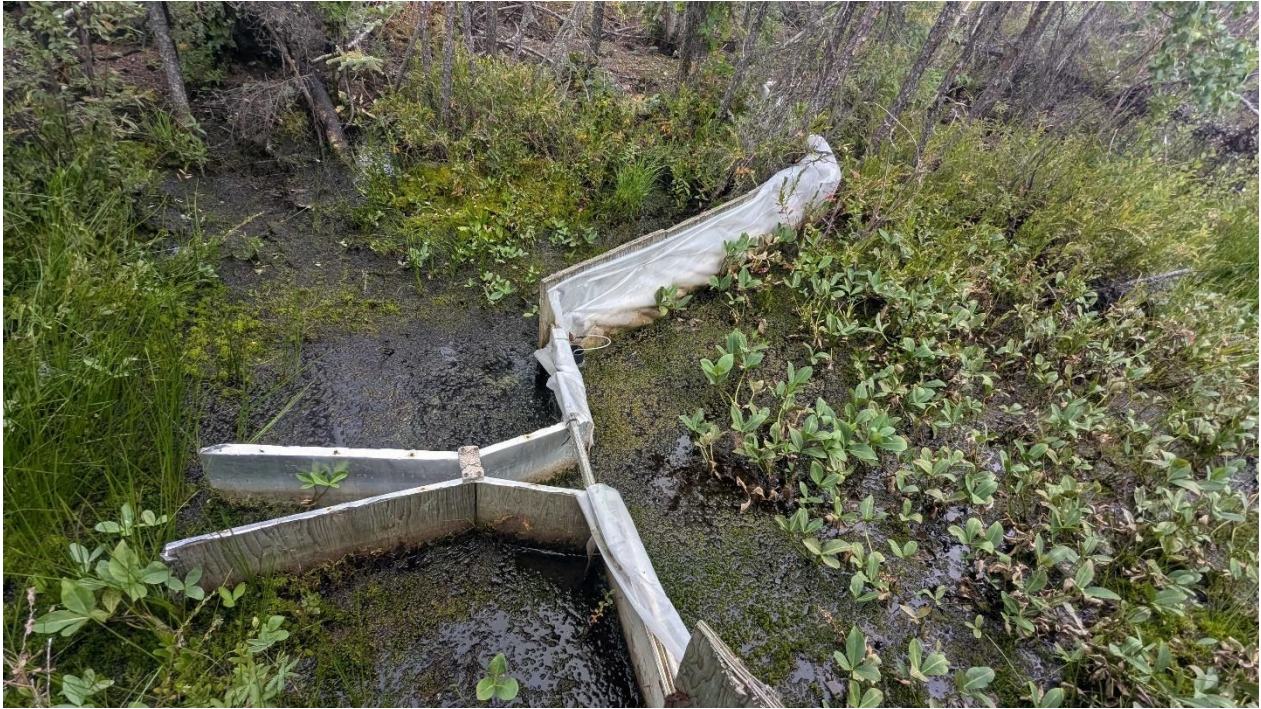

**Figure S4: One flume box in August 2024 (post-fire picture).**

## 2. Supplementary Table

**Table S1:** Annual (hydrological year: October-September) water flux components (mm year<sup>-1</sup>) over the period 1996-2022: snow water equivalent (SWE), rainfall (R), precipitation (P), evapotranspiration (ET) from the Breathing Earth System Simulator (BESS) at the basin and basin's headwater portion scales (ET<sup>BESS\_BASIN</sup> and ET<sup>BESS\_HEAD</sup>), runoff (QBASIN<sub>130</sub> and QBASIN<sub>202</sub>), water storage change calculated from the other water flux components (ΔS<sup>BASIN\_130</sup> and ΔS<sup>BASIN\_202</sup>) and runoff ratio (Runoff ratio<sub>130</sub> and Runoff ratio<sub>202</sub>). The indices "130" and "202" indicate the surface of the basin in square kilometers.

| Hydrological year | SWE | R   | P   | ET <sup>BESS_BASIN</sup> | ET <sup>BESS_HEAD</sup> | QBASIN <sub>130</sub> | QBASIN <sub>202</sub> | ΔS <sup>BASIN_130</sup> | ΔS <sup>BASIN_202</sup> | Runoff ratio <sub>130</sub> | Runoff ratio <sub>202</sub> |
|-------------------|-----|-----|-----|--------------------------|-------------------------|-----------------------|-----------------------|-------------------------|-------------------------|-----------------------------|-----------------------------|
| 1995-10 / 1996-09 | 107 | 305 | 412 | -                        | -                       | 46                    | 30                    | 105                     | 122                     | 0.1                         | 0.1                         |
| 1996-10 / 1997-09 | 91  | 304 | 395 | -                        | -                       | 103                   | 67                    | 31                      | 68                      | 0.3                         | 0.2                         |
| 1997-10 / 1998-09 | 95  | 306 | 401 | -                        | -                       | 115                   | 74                    | 24                      | 65                      | 0.3                         | 0.2                         |
| 1998-10 / 1999-09 | 126 | 283 | 409 | -                        | -                       | 123                   | 79                    | 25                      | 69                      | 0.3                         | 0.2                         |
| 1999-10 / 2000-09 | 135 | 297 | 431 | -                        | -                       | 163                   | 105                   | 8                       | 66                      | 0.4                         | 0.2                         |
| 2000-10 / 2001-09 | 107 | 324 | 431 | -                        | -                       | 188                   | 121                   | -18                     | 49                      | 0.4                         | 0.3                         |
| 2001-10 / 2002-09 | 181 | 233 | 413 | 262                      | 256                     | 231                   | 149                   | -79                     | 3                       | 0.6                         | 0.4                         |
| 2002-10 / 2003-09 | 119 | 285 | 404 | 253                      | 249                     | 159                   | 103                   | -8                      | 48                      | 0.4                         | 0.3                         |
| 2003-10 / 2004-09 | 96  | 151 | 246 | 267                      | 257                     | 110                   | 71                    | -131                    | -92                     | 0.4                         | 0.3                         |
| 2004-10 / 2005-09 | 139 | 215 | 354 | 272                      | 270                     | 160                   | 103                   | -78                     | -21                     | 0.5                         | 0.3                         |
| 2005-10 / 2006-09 | 128 | 211 | 339 | 268                      | 267                     | 241                   | 155                   | -170                    | -84                     | 0.7                         | 0.5                         |
| 2006-10 / 2007-09 | 116 | 234 | 349 | 270                      | 269                     | 191                   | 123                   | -112                    | -44                     | 0.5                         | 0.4                         |
| 2007-10 / 2008-09 | 132 | 199 | 331 | 269                      | 266                     | 155                   | 100                   | -94                     | -38                     | 0.5                         | 0.3                         |
| 2008-10 / 2009-09 | 140 | 311 | 450 | 286                      | 281                     | 305                   | 196                   | -140                    | -32                     | 0.7                         | 0.4                         |
| 2009-10 / 2010-09 | 82  | 301 | 384 | 285                      | 282                     | 270                   | 174                   | -172                    | -76                     | 0.7                         | 0.5                         |
| 2010-10 / 2011-09 | 133 | 277 | 410 | 311                      | 305                     | 227                   | 146                   | -128                    | -47                     | 0.6                         | 0.4                         |
| 2011-10 / 2012-09 | 81  | 253 | 334 | 280                      | 277                     | 210                   | 135                   | -156                    | -81                     | 0.6                         | 0.4                         |
| 2012-10 / 2013-09 | 106 | 153 | 259 | 269                      | 263                     | 71                    | 45                    | -81                     | -56                     | 0.3                         | 0.2                         |
| 2013-10 / 2014-09 | 81  | 134 | 215 | 272                      | 269                     | 26                    | 17                    | -83                     | -73                     | 0.1                         | 0.1                         |
| 2014-10 / 2015-09 | 118 | 274 | 392 | 254                      | 252                     | 135                   | 87                    | 2                       | 51                      | 0.3                         | 0.2                         |
| 2015-10 / 2016-09 | 126 | 175 | 301 | 258                      | 255                     | 108                   | 70                    | -65                     | -27                     | 0.4                         | 0.2                         |
| 2016-10 / 2017-09 | 84  | 196 | 280 | 233                      | 233                     | 91                    | 58                    | -43                     | -11                     | 0.3                         | 0.2                         |

|                      |     |     |     |     |     |     |     |      |     |     |     |
|----------------------|-----|-----|-----|-----|-----|-----|-----|------|-----|-----|-----|
| 2017-10 /<br>2018-09 | 90  | 179 | 269 | 223 | 222 | 75  | 48  | -29  | -2  | 0.3 | 0.2 |
| 2018-10 /<br>2019-09 | 84  | 246 | 330 | 240 | 237 | 63  | 41  | 27   | 50  | 0.2 | 0.1 |
| 2019-10 /<br>2020-09 | 96  | 321 | 416 | 236 | 230 | 317 | 204 | -137 | -24 | 0.8 | 0.5 |
| 2020-10 /<br>2021-09 | 101 | 298 | 399 | 230 | 229 | 151 | 97  | 18   | 72  | 0.4 | 0.2 |
| 2021-10 /<br>2022-09 | 127 | 111 | 238 | 239 | 242 | 145 | 93  | -147 | -95 | 0.6 | 0.4 |
